# Supplementary material for: The active role of excited states of phenothiazines in photoinduced metal free atom transfer radical polymerization: singlet or triplet excited states?
Source: Royal Society of Chemistry journal article supplement (doi:10.1039/c6py01410k), 2016-01-01
Supplement: c6py01410k1.pdf [file c6py01410k1.pdf]

## Electronic Supplementary Information

### The Active Role of Excited States of Phenothiazines in Photoinduced Metal Free

#### Atom Transfer Radical Polymerization: Singlet or Triplet Excited States?

Steffen Jockusch<sup>a\*</sup> and Yusuf Yagci<sup>b\*</sup>

<sup>a</sup>Department of Chemistry, Columbia University, New York, NY 10027, United States

<sup>b</sup>Department of Chemistry, Istanbul Technical University, Maslak, Istanbul 34469, Turkey

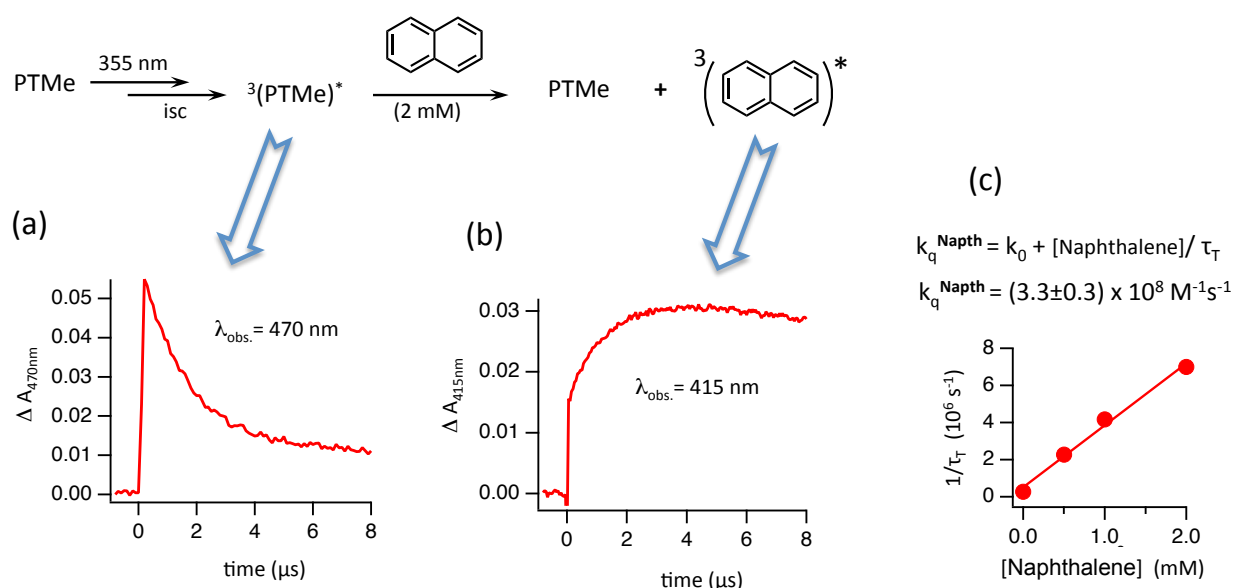

**Fig. S1** Transient absorption decay traces monitored at 470 nm (a) and 415 nm (b) following laser excitation ( $\lambda_{\text{ex}} = 355 \text{ nm}$ , 7 ns pulse width) of PTMe in the presence of 2 mM naphthalene in argon saturated DMA solutions, and plot of inverse PTMe triplet lifetime vs. varying naphthalene concentrations (c) in argon saturated DMA solutions.

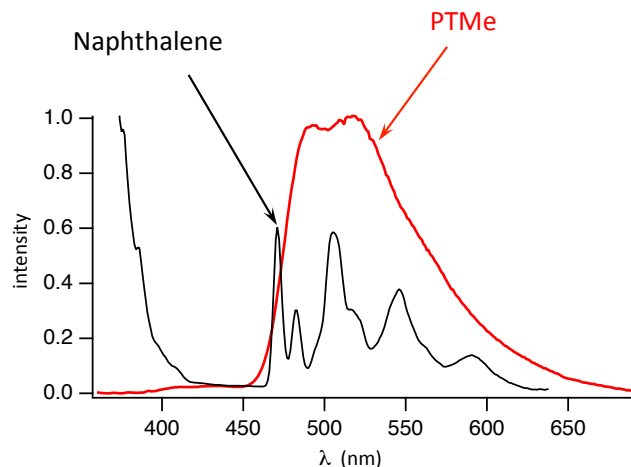

**Fig. S2** Phosphorescence spectra of PTMe ( $\lambda_{\text{ex}} = 350$  nm) and naphthalene ( $\lambda_{\text{ex}} = 300$  nm) in DMA at 77K. The triplet energy of naphthalene in DMA was determined from the first peak of phosphorescence ( $E_T = 254$  kJ/mol). Because of the broad, structureless PTMe phosphorescence, the exact value of the triplet energy is not clear, but should be close to 254 kJ/mol.

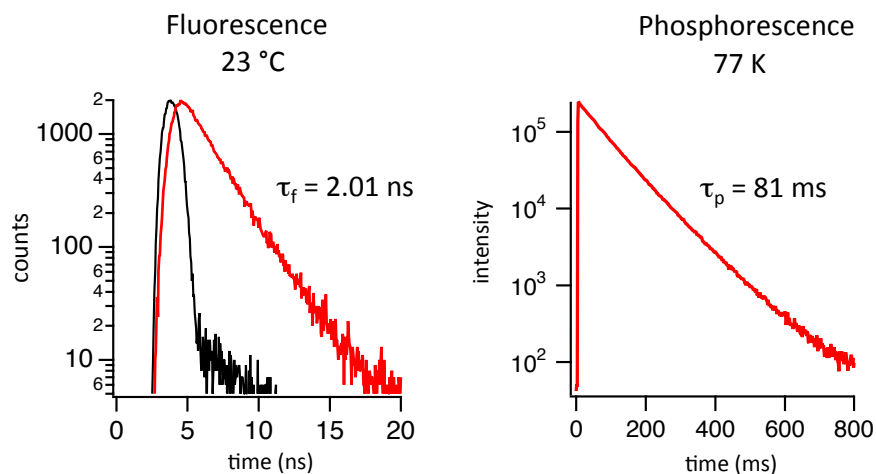

**Fig. S3** Left: Fluorescence decay (red) of PTMe in DMA at 23 °C with 350 nm excitation monitored at 450 nm. Instruments response function (black). Right: Phosphorescence decay of PTMe in DMA at 77 K with 350 nm excitation monitored at 490 nm.

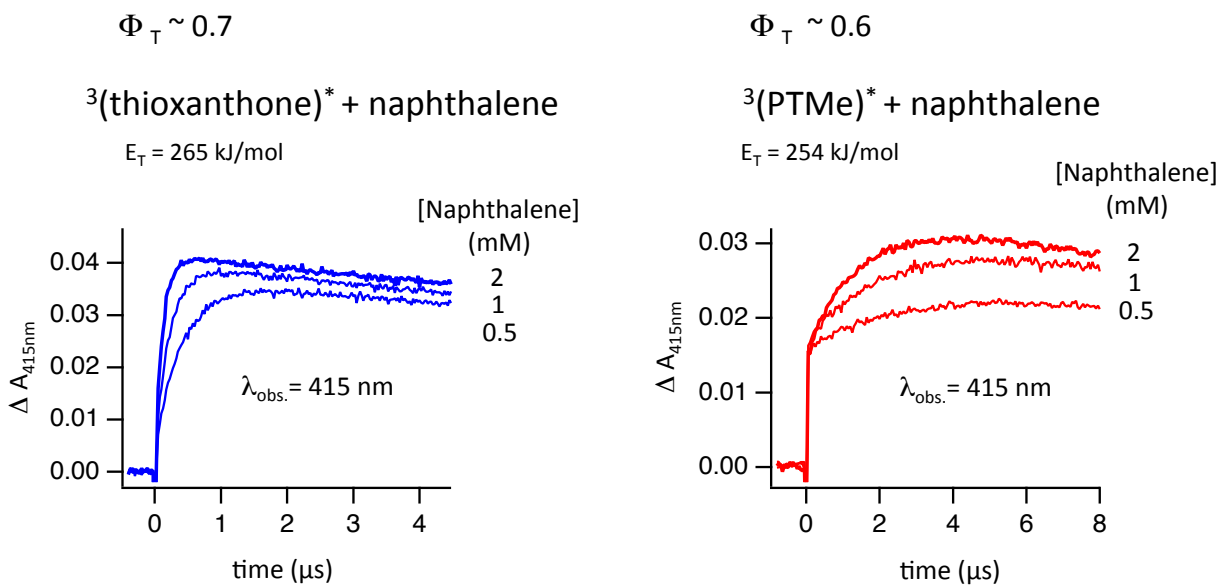

**Fig. S4** Transient absorption decay traces monitored at 415 nm (naphthalene triplet) following laser excitation ( $\lambda_{\text{ex}} = 355 \text{ nm}$ , 7 ns pulse width) of thioxanthone (left) or PTMe (right) in the presence of varying amounts of naphthalene in argon saturated DMA solutions.
